# Supplementary material for: Synthesis and in vitro antimicrobial activity evaluation of coumarin-3-carboxylic acids obtained via cascade reaction using chitosan as a recyclable catalyst
Source: Royal Society of Chemistry journal article supplement (doi:10.1039/d4nj02261k), 2024-01-01
Supplement: d4nj02261k1.pdf [file d4nj02261k1.pdf]

## Support Information

### Synthesis and *in vitro* antimicrobial activity evaluation of coumarin-3-carboxylic acids obtained via cascade reaction using chitosan as a recyclable catalyst

Paloma G. Abrantes,<sup>a</sup> Israel F. Costa,<sup>b</sup> Poliana G. Abrantes,<sup>a</sup> Renata R. Magalhães,<sup>a</sup> Bráulio A. Teixeira,<sup>c</sup> José Lucas F. M. Galvão,<sup>c</sup> Edeltrudes O. Lima,<sup>c</sup> Ercules E. S. Teotonio,<sup>a</sup> Juliana A. Vale<sup>a,\*</sup>

<sup>a</sup> Departamento de Química - Universidade Federal da Paraíba - UFPB. Jardim Cidade Universitária, João Pessoa/PB - Brasil, CEP: 58051-900.

<sup>b</sup> Departamento de Química Fundamental, Instituto de Química da Universidade de São Paulo, Av. Prof. Lineu Prestes, 748, São Paulo/SP – Brasil, CEP: 05508-000.

<sup>c</sup> Departamento de Ciências Farmacêuticas - Universidade Federal da Paraíba - UFPB. Jardim Cidade Universitária, João Pessoa/PB - Brasil, CEP: 58051-900.

\*Corresponding author: [julianadqf@yahoo.com.br](mailto:julianadqf@yahoo.com.br)

Tel. +558332167941

#### Estimation of the degree of deacetylation using the Sabnis and Block Method (1997)<sup>1</sup>

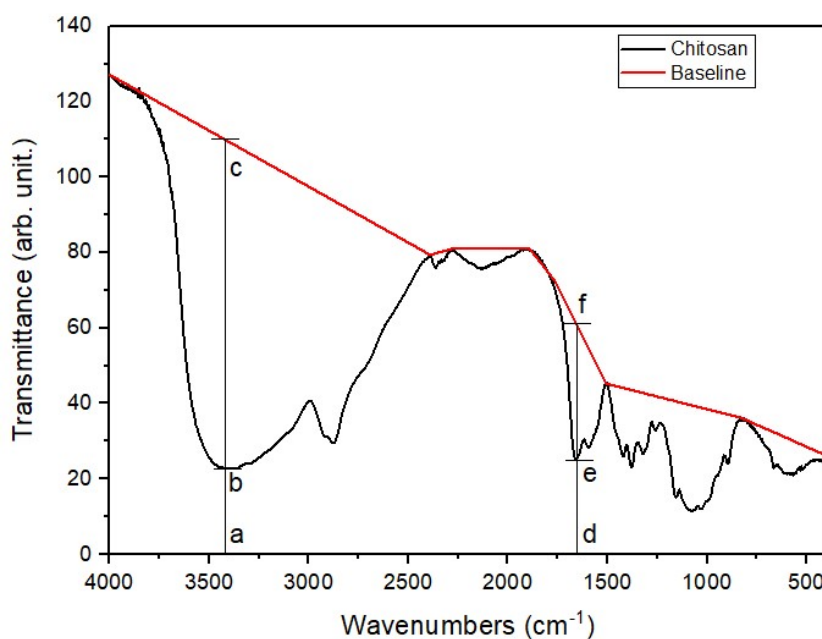

Figure S1. FT-IR spectra of commercial chitosan recorded in the range 400–4000 cm<sup>-1</sup> using KBr pellets.

The hydroxyl band absorbance (3450 cm<sup>-1</sup>) is given by:

$$(A)_{\text{hydroxyl}} = \log_{10} (AC/AB) \quad \text{Eq. 1}$$

The amide band absorbance ( $1655 \text{ cm}^{-1}$ ) is given by:

$$(A)_{\text{amide}} = \log_{10} (DF/DE) \quad \text{Eq. 2}$$

Based on the absorbances of the hydroxyl and amide I signals, the degree of deacetylation (DD) of chitosan is calculated using equation 3:

$$DD = 97.67 - [26.486 \cdot (A_{\text{amide}}/A_{\text{hydroxyl}})] \quad \text{Eq. 3}$$

### <sup>1</sup>H and <sup>13</sup>C NMR shift data

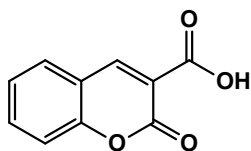

**2-oxo-2H-chromene-3-carboxylic acid (3a):** White crystal (79 mg, 83%). <sup>1</sup>H NMR (400 MHz, DMSO-*d*<sub>6</sub>)  $\delta$  7.46 – 7.37 (m, 2H, Ar-H), 7.72 (ddd, 1H, Ar-H,  $J = 8.8, 7.3, 1.7$  Hz), 7.90 (dd, 1H, Ar-H,  $J = 7.8, 1.7$  Hz), 8.73 (s, 1H, CH). <sup>13</sup>C NMR (100 MHz, DMSO-*d*<sub>6</sub>)  $\delta$  116.16, 118.01, 118.39, 124.87, 130.22, 134.33, 148.39, 154.50, 156.76, 164.02. Displacement data consistent with Brahmachari (2015).<sup>2</sup>

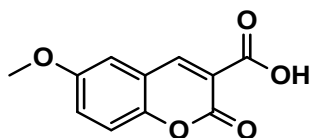

**6-methoxy-2-oxo-2H-chromene-3-carboxylic acid (3b):** Yellowish crystal (97 mg, 88%). <sup>1</sup>H NMR (500 MHz, DMSO-*d*<sub>6</sub>)  $\delta$  3.80 (s, 3H, CH<sub>3</sub>), 7.31 (dd, 1H, Ar-H,  $J = 9.1, 3.0$  Hz), 7.37 (d, 1H, Ar-H,  $J = 9.2$  Hz), 7.44 (d, 1H, Ar-H,  $J = 2.9$  Hz), 8.67 (s, 1H, CH). <sup>13</sup>C NMR (125 MHz, DMSO-*d*<sub>6</sub>)  $\delta$  55.89, 111.90, 117.35, 118.46, 118.64, 122.16, 148.20, 148.99, 155.81, 157.11, 164.12. Displacement data consistent with Brahmachari (2015).<sup>2</sup>

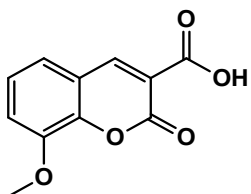

**8-methoxy-2-oxo-2H-chromene-3-carboxylic acid (3c):** Yellowish crystal (90 mg, 82%). <sup>1</sup>H NMR (500 MHz, DMSO-*d*<sub>6</sub>)  $\delta$  3.91 (s, 3H, CH<sub>3</sub>), 7.32 (t, 1H, Ar-H,  $J = 7.9$  Hz), 7.41 (ddd, Ar-H, 2H,  $J = 15.4, 7.9, 1.4$  Hz), 8.69 (s, 1H, CH). <sup>13</sup>C NMR (125 MHz,

DMSO-*d*<sub>6</sub>)  $\delta$  56.22, 116.28, 118.53, 121.14, 124.80, 143.85, 146.28, 148.63, 156.48, 164.02. Displacement data consistent with Chavan and Bandgar (2013).<sup>3</sup>

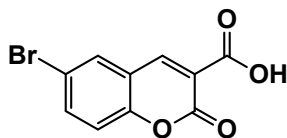

**6-Bromo-2-oxo-2H-chromene-3-carboxylic acid (3d):** White crystal (112 mg, 83%). <sup>1</sup>H NMR (500 MHz, DMSO-*d*<sub>6</sub>)  $\delta$  7.39 (d, 1H, Ar-H, *J* = 8.8 Hz), 7.85 (dd, 1H, Ar-H, *J* = 8.8, 2.4 Hz), 8.14 (d, 1H, Ar-H, *J* = 2.4 Hz), 8.66 (s, 1H, CH). <sup>13</sup>C NMR (125 MHz, DMSO-*d*<sub>6</sub>)  $\delta$  116.31, 118.50, 119.62, 119.92, 132.04, 136.46, 146.98, 153.57, 156.19, 163.82. Displacement data consistent with Brahmachari (2015).<sup>2</sup>

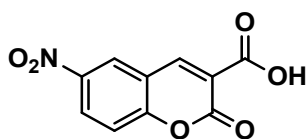

**6-nitro-2-oxo-2H-chromene-3-carboxylic acid (3e):** Yellowish crystal (96 mg, 82%). <sup>1</sup>H NMR (500 MHz, DMSO-*d*<sub>6</sub>)  $\delta$  7.63 (d, 1H, Ar-H, *J* = 9.2 Hz), 8.48 (dd, 1H, Ar-H, *J* = 9.1, 2.8 Hz), 8.87 (s, 1H, CH), 8.88 (d, 1H, Ar-H, *J* = 2.7 Hz). <sup>13</sup>C NMR (125 MHz, DMSO-*d*<sub>6</sub>)  $\delta$  117.76, 118.40, 120.39, 125.98, 128.38, 143.69, 147.17, 155.51, 158.09, 163.56. Displacement data consistent with Brahmachari (2015).<sup>2</sup>

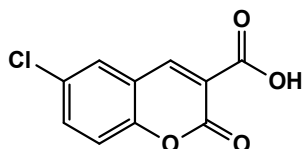

**6-chloro-2-oxo-2H-chromene-3-carboxylic acid (3f):** White crystal (91 mg, 81%). <sup>1</sup>H NMR (500 MHz, DMSO-*d*<sub>6</sub>)  $\delta$  7.47 (d, 1H, *J* = 8.9 Hz, Ar-H), 7.75 (ddd, 1H, *J* = 8.8, 2.6, 0.7 Hz, Ar-H), 8.03 (d, 1H, *J* = 2.6 Hz, Ar-H), 8.69 (s, 1H, CH). <sup>13</sup>C NMR (125 MHz, DMSO-*d*<sub>6</sub>)  $\delta$  118.17, 119.37, 119.60, 128.42, 128.98, 133.61, 146.97, 153.11, 156.12, 163.75. Displacement data consistent with Brahmachari (2015).<sup>2</sup>

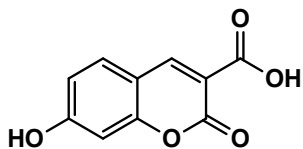

**7-hydroxy-2-oxo-2H-chromene-3-carboxylic acid (3g):** Yellowish crystal (91 mg, 88%). <sup>1</sup>H NMR (500 MHz, DMSO-*d*<sub>6</sub>)  $\delta$  6.73 (d, 1H, *J* = 2.2 Hz, Ar-H), 6.84 (dd, 1H, *J* = 8.6, 2.3 Hz, Ar-H), 7.74 (d, 1H, *J* = 8.6 Hz, Ar-H), 8.68 (s, 1H, CH). <sup>13</sup>C NMR (125 MHz, DMSO-*d*<sub>6</sub>)  $\delta$  101.81, 110.64, 112.53, 114.03, 132.06, 149.42, 157.01, 157.56, 163.94, 164.24. Displacement data consistent with Brahmachari (2015).<sup>2</sup>

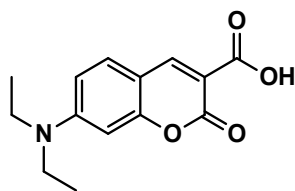

**7-(diethylamino)-2-oxo-2H-chromene-3-carboxylic acid (3h):** Orange crystal (104 mg, 80%).  $^1\text{H}$  NMR (400 MHz,  $\text{DMSO-}d_6$ )  $\delta$  1.13 (t, 6H,  $J = 7.0$  Hz,  $\text{CH}_3$ ), 3.47 (q, 4H,  $J = 7.1$  Hz,  $\text{CH}_2$ ), 6.54 (d, 1H,  $J = 2.4$  Hz, Ar-H), 6.77 (dd, 1H,  $J = 9.0, 2.4$  Hz, Ar-H), 7.62 (d, 1H,  $J = 9.0$  Hz, Ar-H), 8.56 (s, 1H, CH).  $^{13}\text{C}$  NMR (126 MHz,  $\text{DMSO-}d_6$ )  $\delta$  12.39, 44.51, 95.98, 107.16, 107.46, 110.17, 131.95, 149.54, 153.02, 157.97, 159.72, 164.62. Displacement data consistent with Bardajee and collaborators (2010).<sup>4</sup>

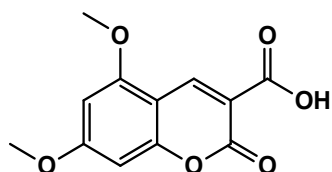

**5,7-dimethoxy-2-oxo-2H-chromene-3-carboxylic acid (3i):** Yellowish crystal (96 mg, 77%).  $^1\text{H}$  NMR (500 MHz,  $\text{DMSO-}d_6$ )  $\delta$  3.89 (s, 3H,  $\text{CH}_3$ ), 3.94 (s, 3H,  $\text{CH}_3$ ), 6.54 (s, 1H, Ar-H), 6.63 (s, 1H, Ar-H), 8.63 (s, 1H, CH).  $^{13}\text{C}$  NMR (125 MHz,  $\text{DMSO-}d_6$ )  $\delta$  56.40, 56.63, 93.05, 95.29, 102.75, 111.35, 143.51, 157.14, 157.65, 158.12, 164.06, 166.28. Displacement data consistent with Chavan and Bandgar (2013).<sup>3</sup>

## References

- 1 S. Sabnis and L. H. Block, *Polym. Bull.*, 1997, **39**, 67-71.
- 2 G. Brahmachari, *ACS Sustain. Chem. Eng.*, 2015, **3**, 2350-2358.
- 3 H. V. Chavan and B. P. Bandgar, *ACS Sustain. Chem. Eng.*, 2013, **1**, 929-936.
- 4 G. Bardajee, F. Jafarpour and H. Afsari, *Open Chem.*, 2010, **8**, 370-374.

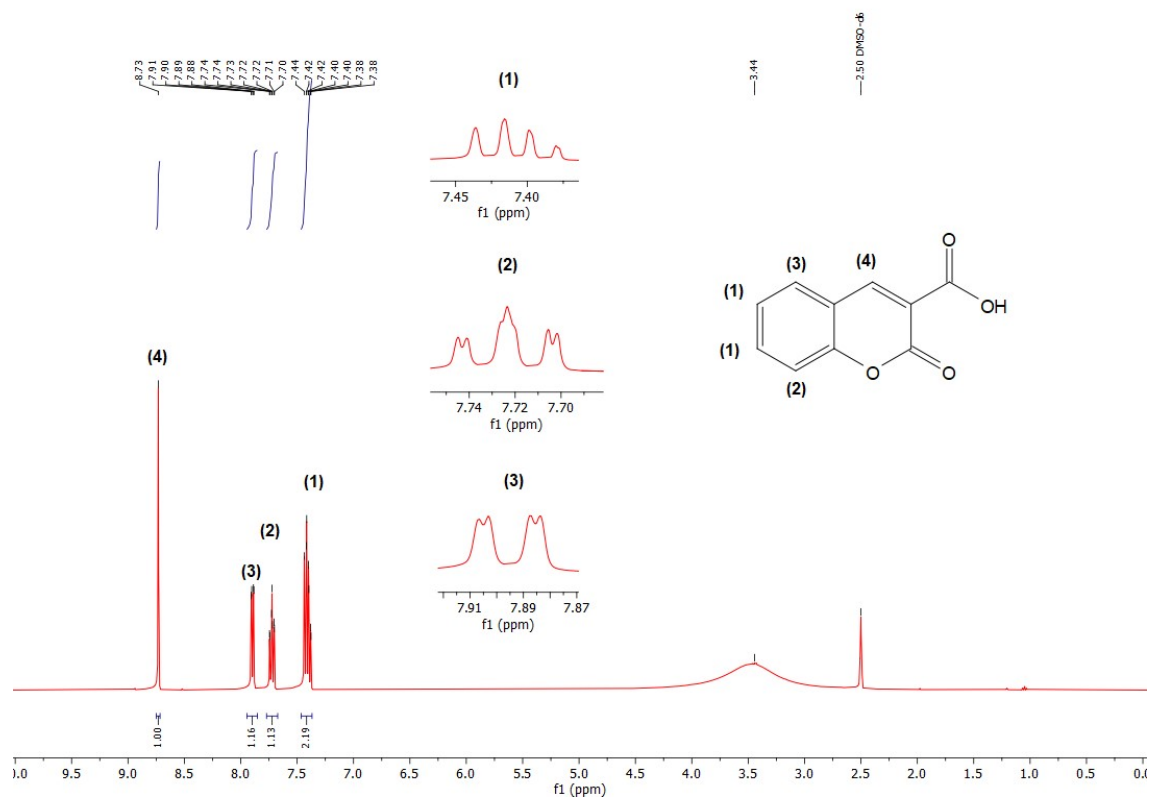

**Figure S2.** <sup>1</sup>H NMR spectrum (DMSO-*d*<sub>6</sub>, 400 MHz) of Compound (3a).

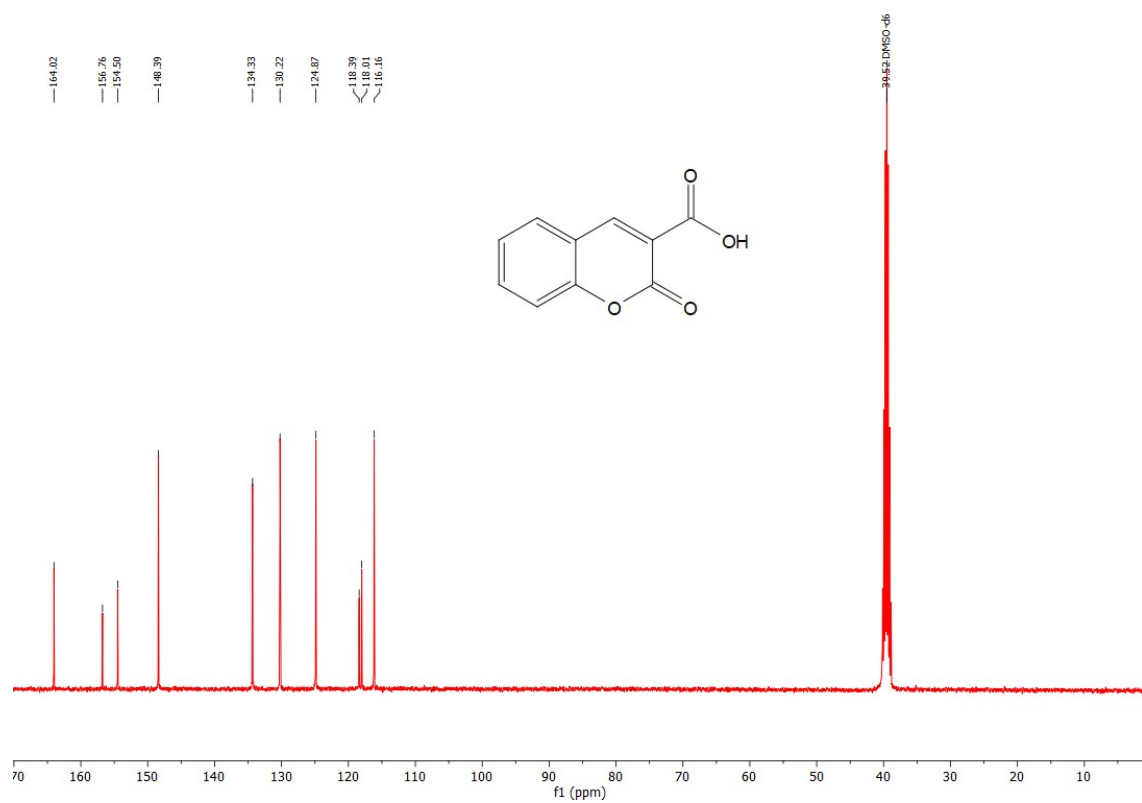

**Figure S3.** <sup>13</sup>C NMR spectrum (DMSO-*d*<sub>6</sub>, 100 MHz) of Compound (3a).

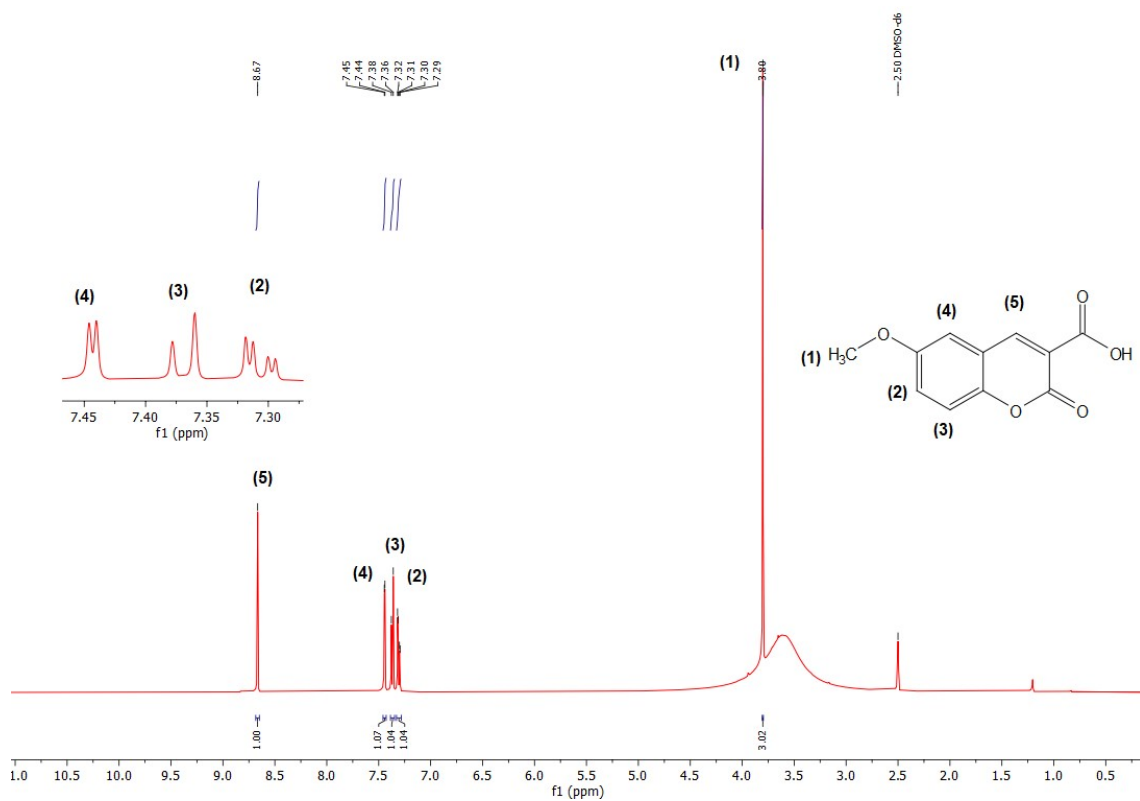

**Figure S4.** <sup>1</sup>H NMR spectrum (DMSO-*d*<sub>6</sub>, 500 MHz) of Compound (3b).

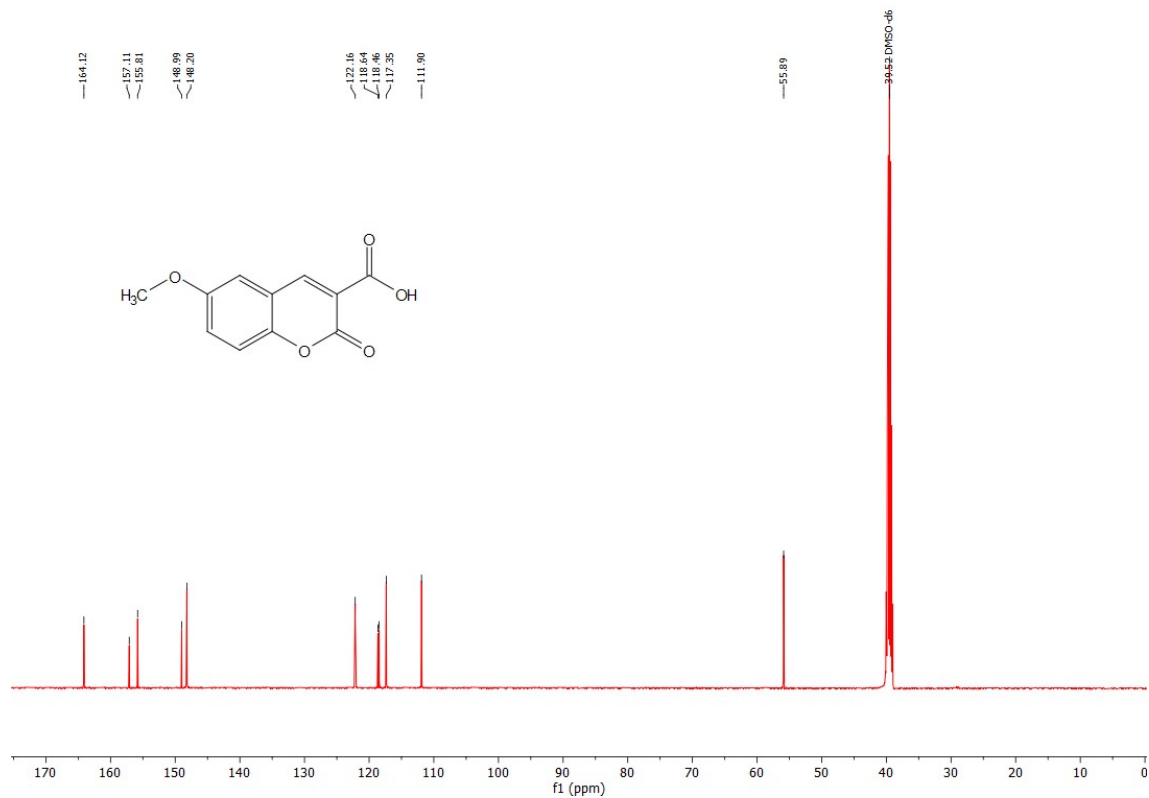

**Figure S5.** <sup>13</sup>C NMR spectrum (DMSO-*d*<sub>6</sub>, 125 MHz) of Compound (3b).

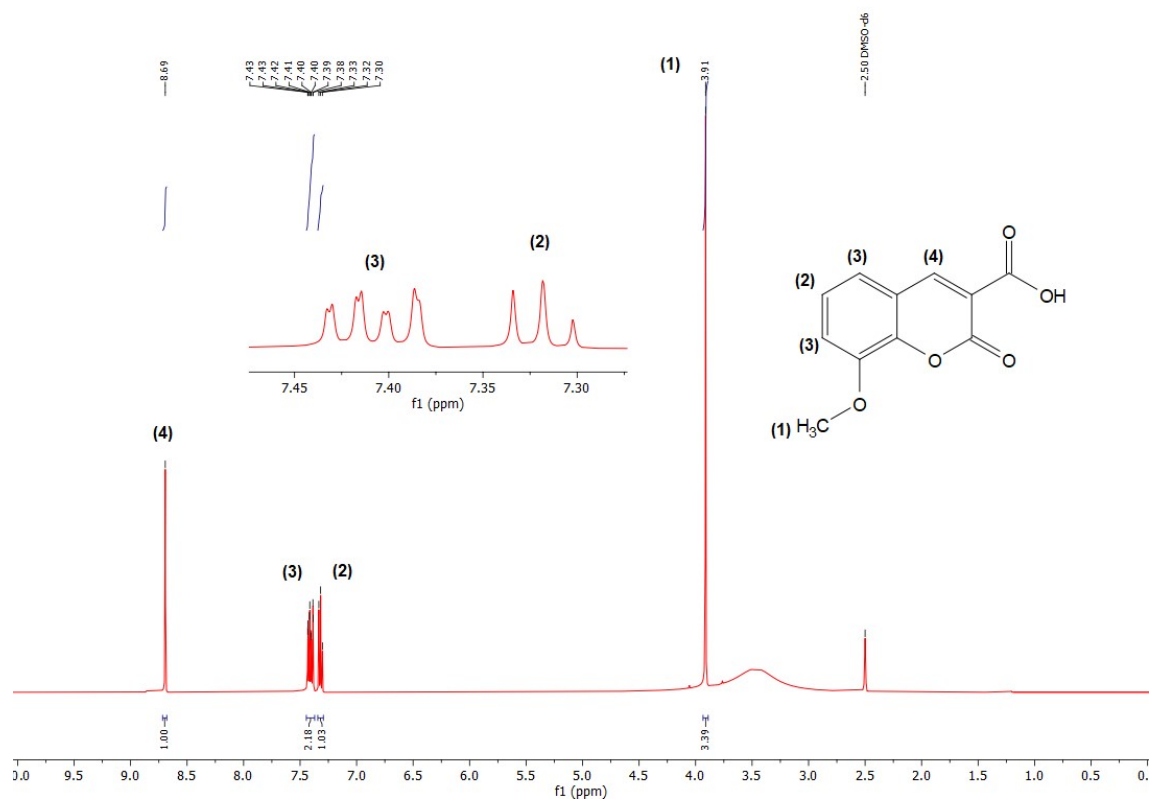

**Figure S6.**  $^1\text{H}$  NMR spectrum (DMSO- $d_6$ , 500 MHz) of Compound (3c).

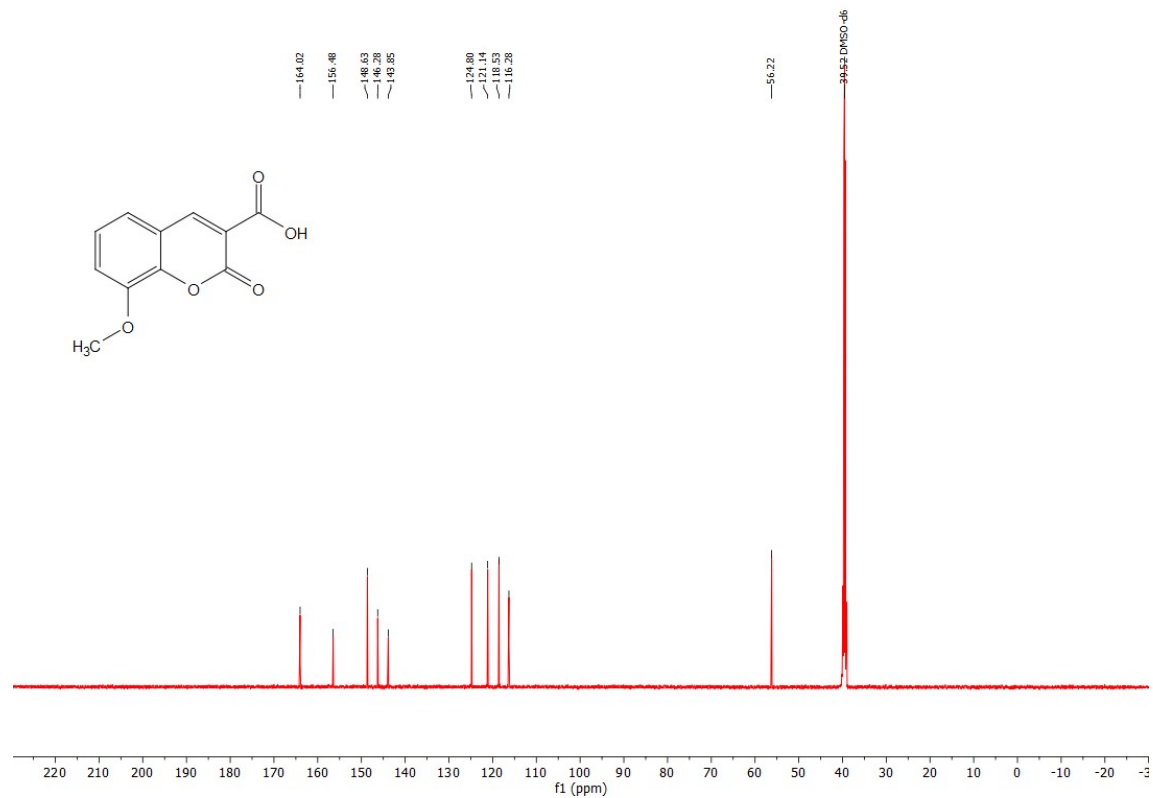

**Figure S7.**  $^{13}\text{C}$  NMR spectrum (DMSO- $d_6$ , 125 MHz) of Compound (3c).

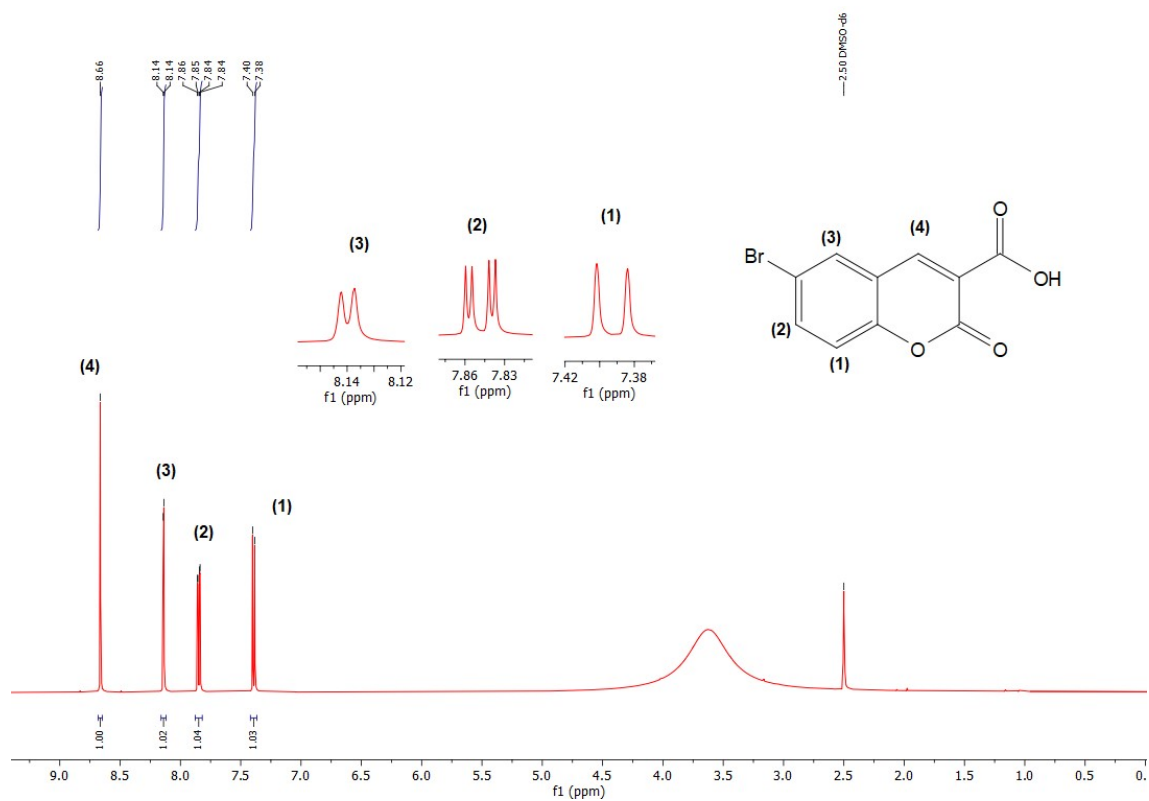

**Figure S8.** <sup>1</sup>H NMR spectrum (DMSO-*d*<sub>6</sub>, 500 MHz) of Compound (3d).

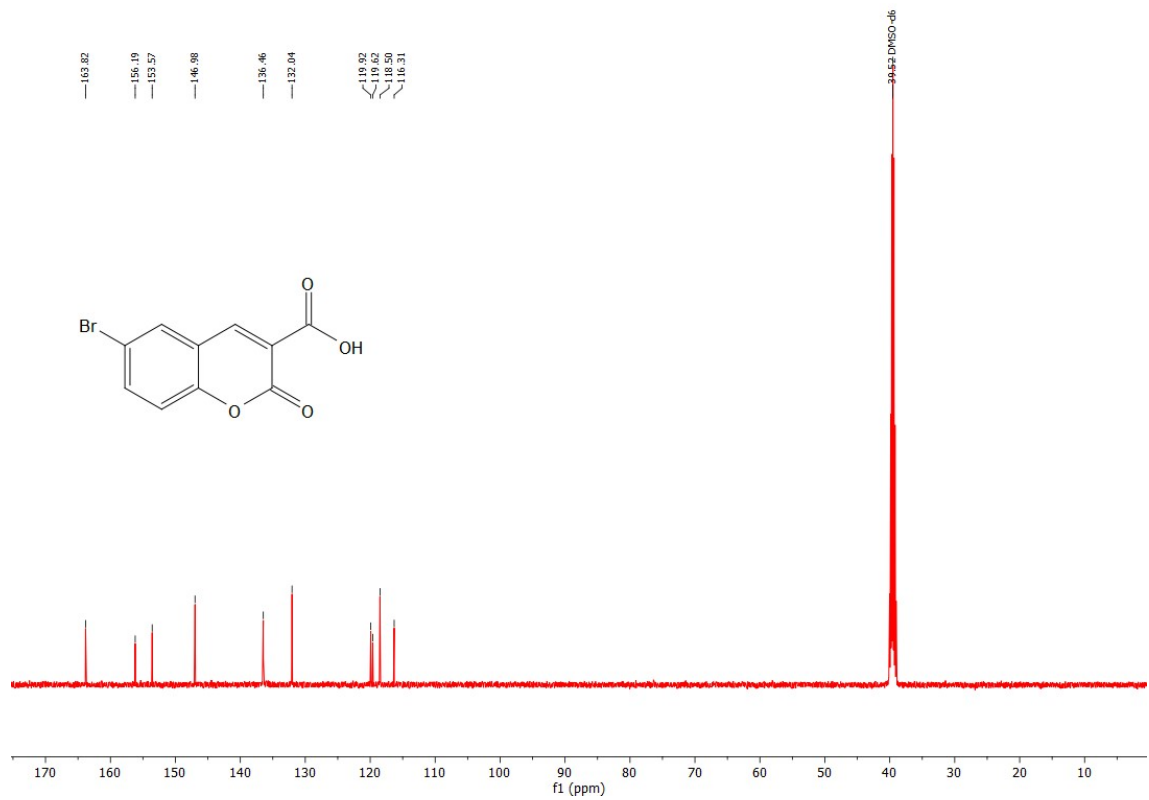

**Figure S9.** <sup>13</sup>C NMR spectrum (DMSO-*d*<sub>6</sub>, 125 MHz) of Compound (3d).



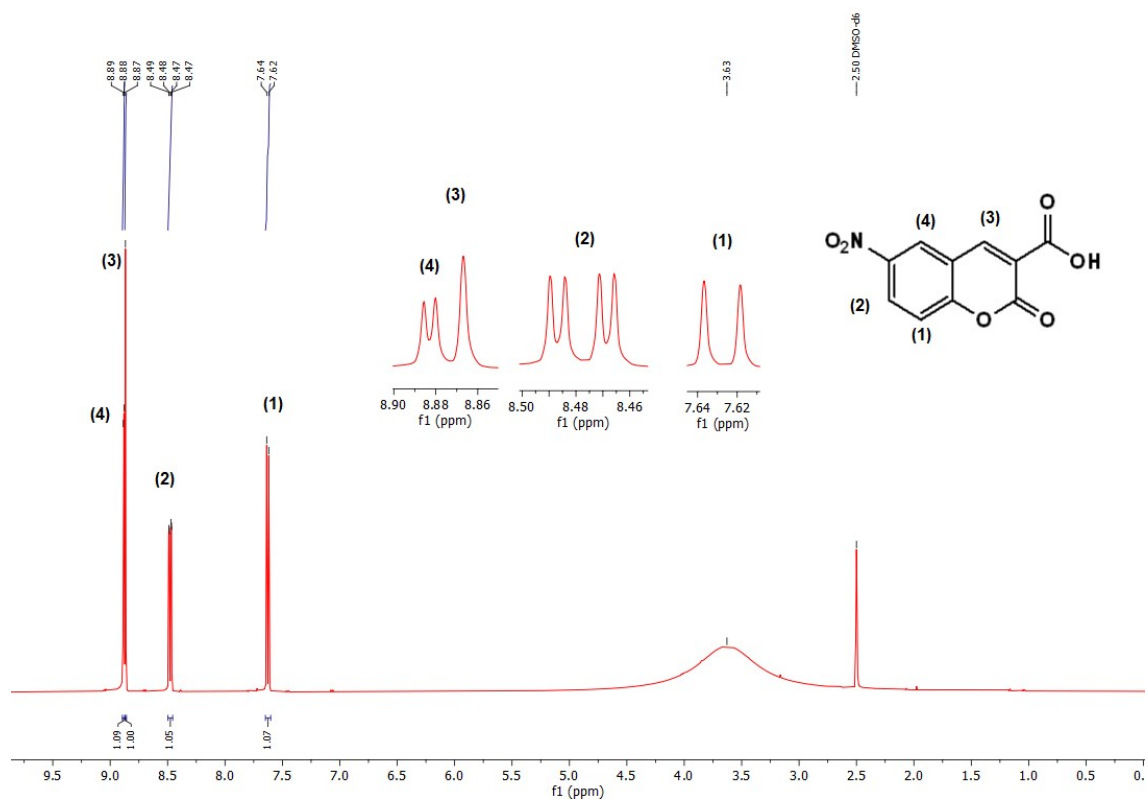

**Figure S10.** <sup>1</sup>H NMR spectrum (DMSO-*d*<sub>6</sub>, 500 MHz) of Compound (3e).

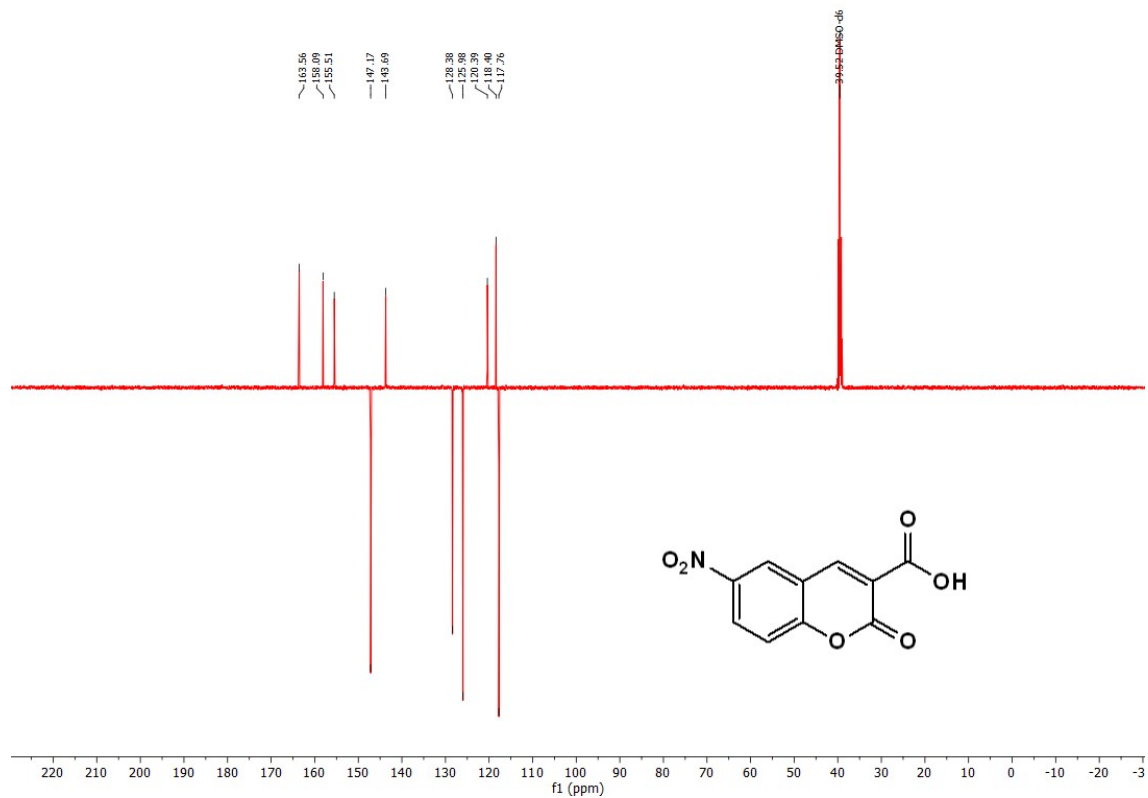

**Figure S11.** <sup>13</sup>C NMR spectrum (DMSO-*d*<sub>6</sub>, 125 MHz) of Compound (3e).

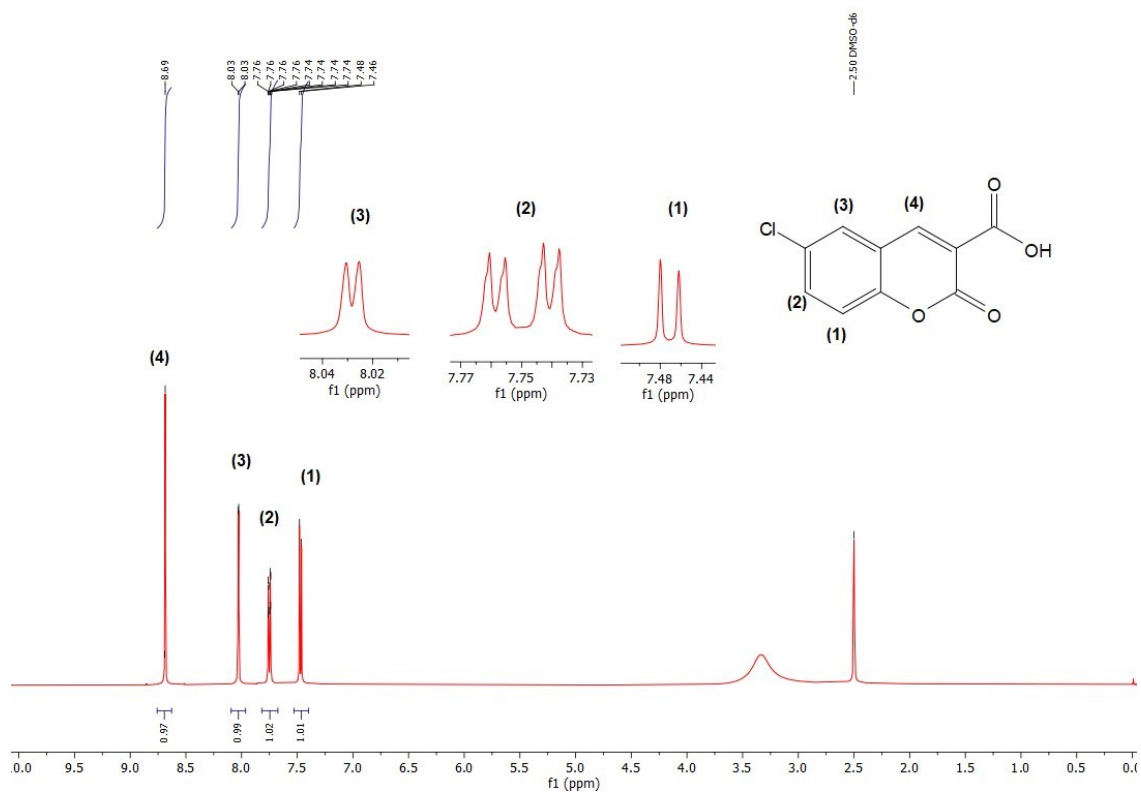

**Figure S12.** <sup>1</sup>H NMR spectrum (DMSO-*d*<sub>6</sub>, 500 MHz) of Compound (3f).

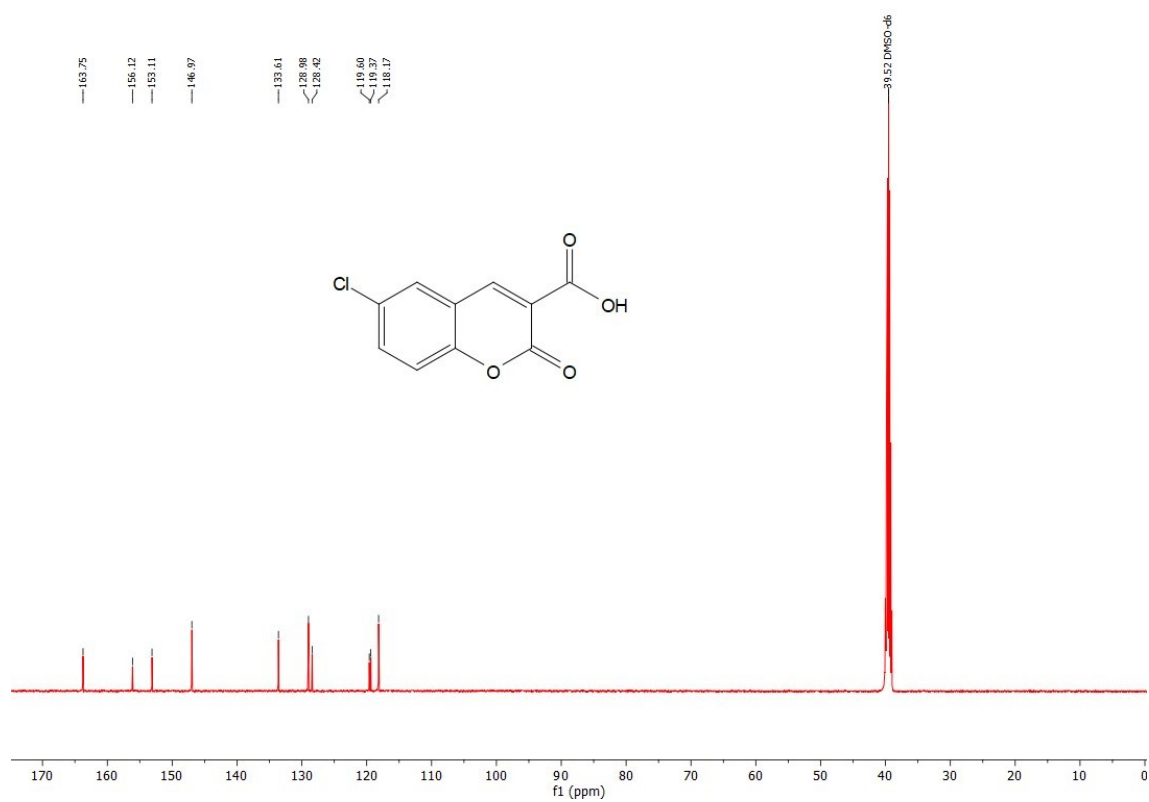

**Figure S13.** <sup>13</sup>C NMR spectrum (DMSO-*d*<sub>6</sub>, 125 MHz) of Compound (3f).

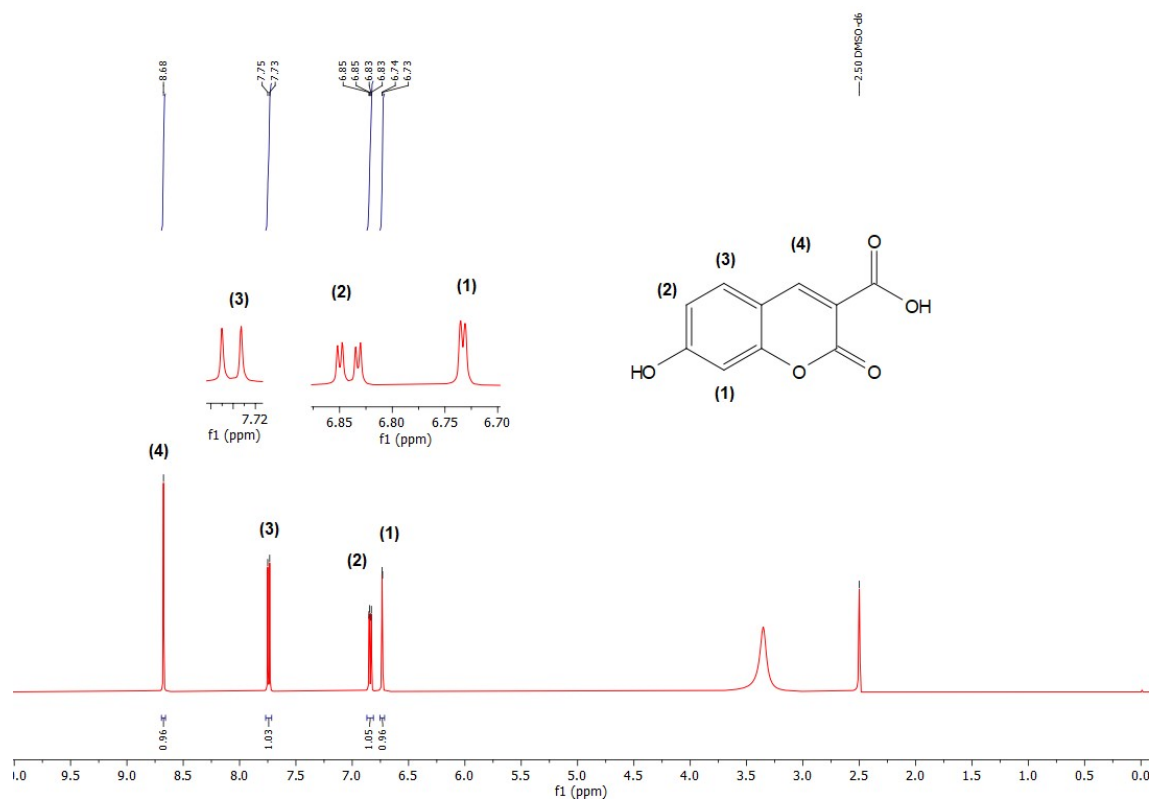

**Figure S14.**  $^1\text{H}$  NMR spectrum (DMSO- $d_6$ , 500 MHz) of Compound (3g).

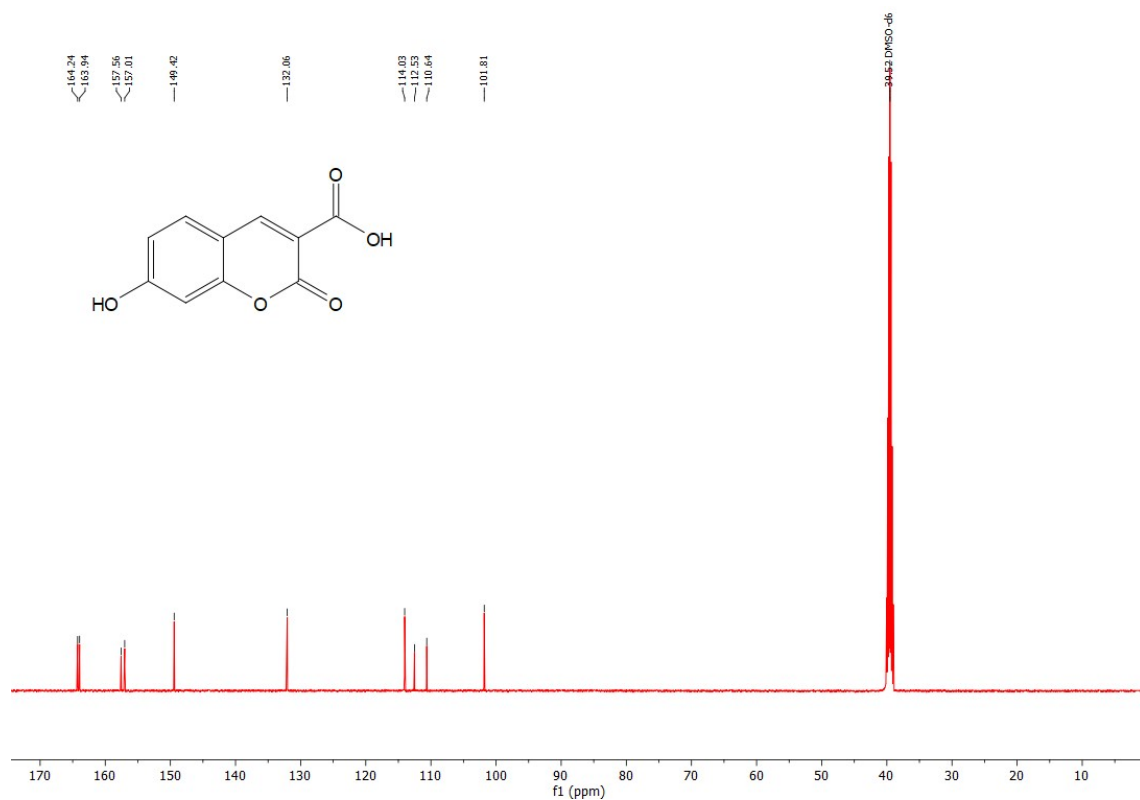

**Figure S15.**  $^{13}\text{C}$  NMR spectrum (DMSO- $d_6$ , 125 MHz) of Compound (3g).

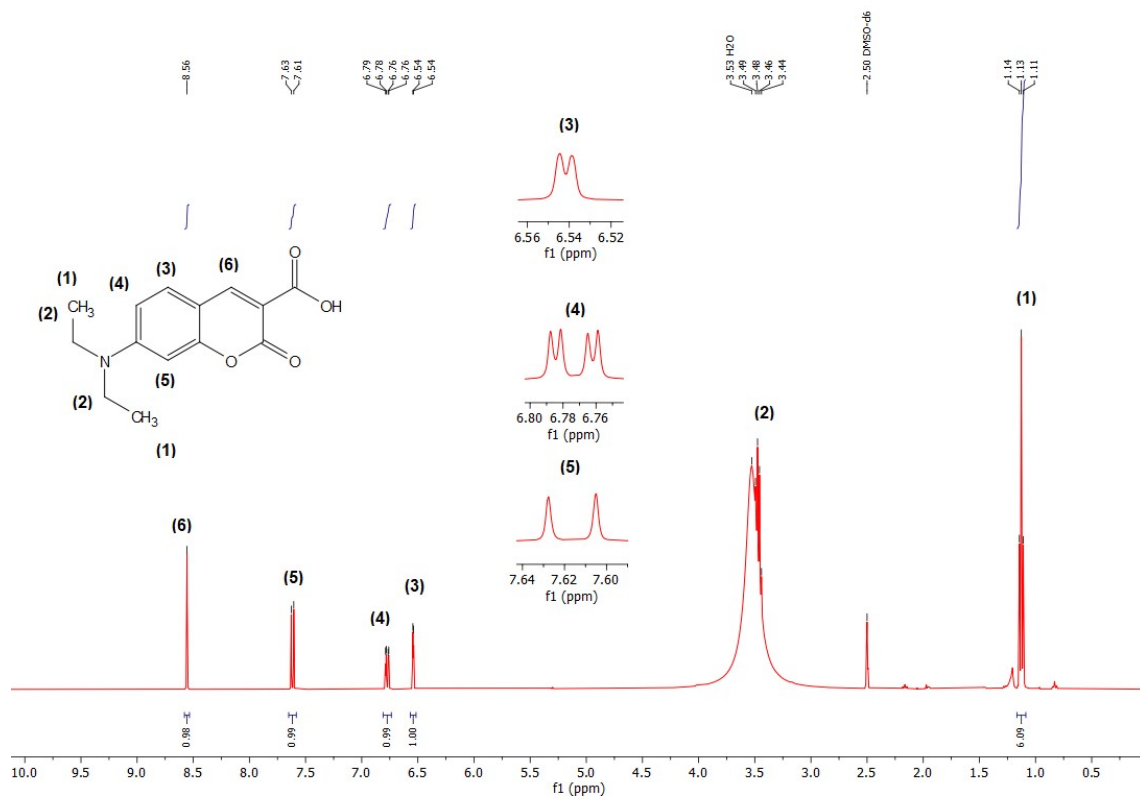

**Figure S16.**  $^1\text{H}$  NMR spectrum (DMSO- $d_6$ , 400 MHz) of Compound (3h).

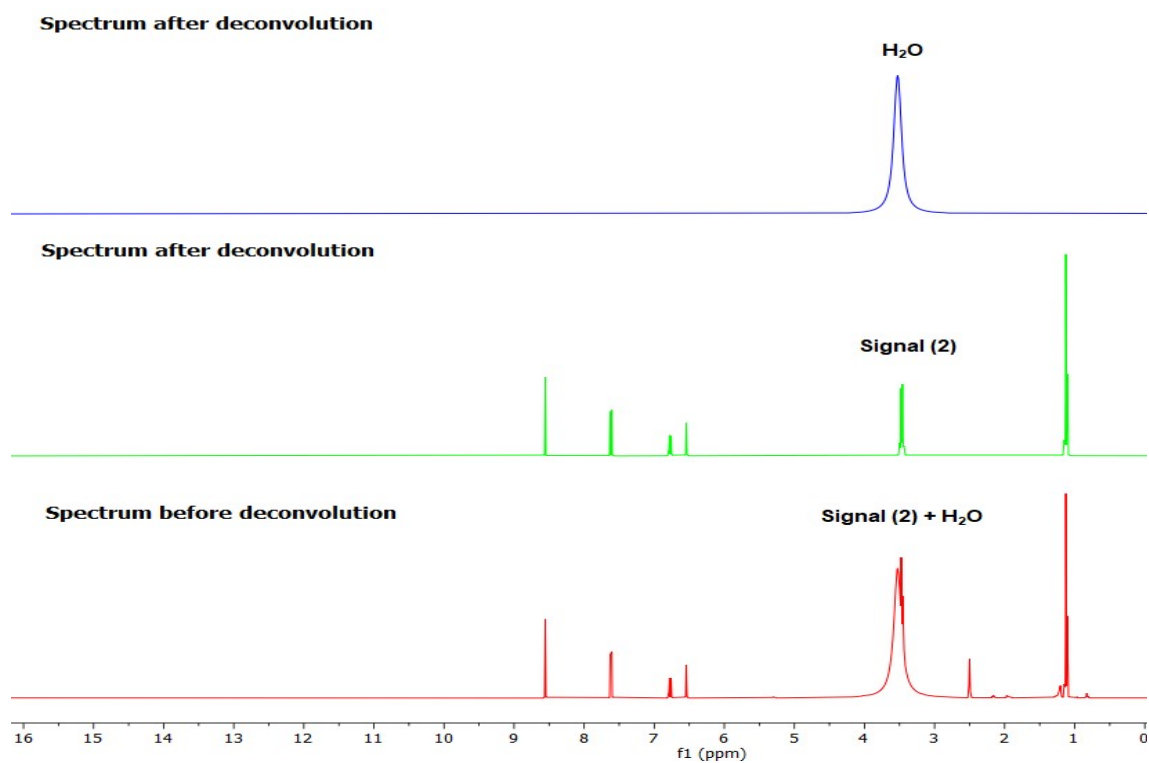

**Figure S17.**  $^1\text{H}$  NMR spectrum before (red) and after (green) deconvolution (DMSO- $d_6$ , 400 MHz) of Compound (3h).



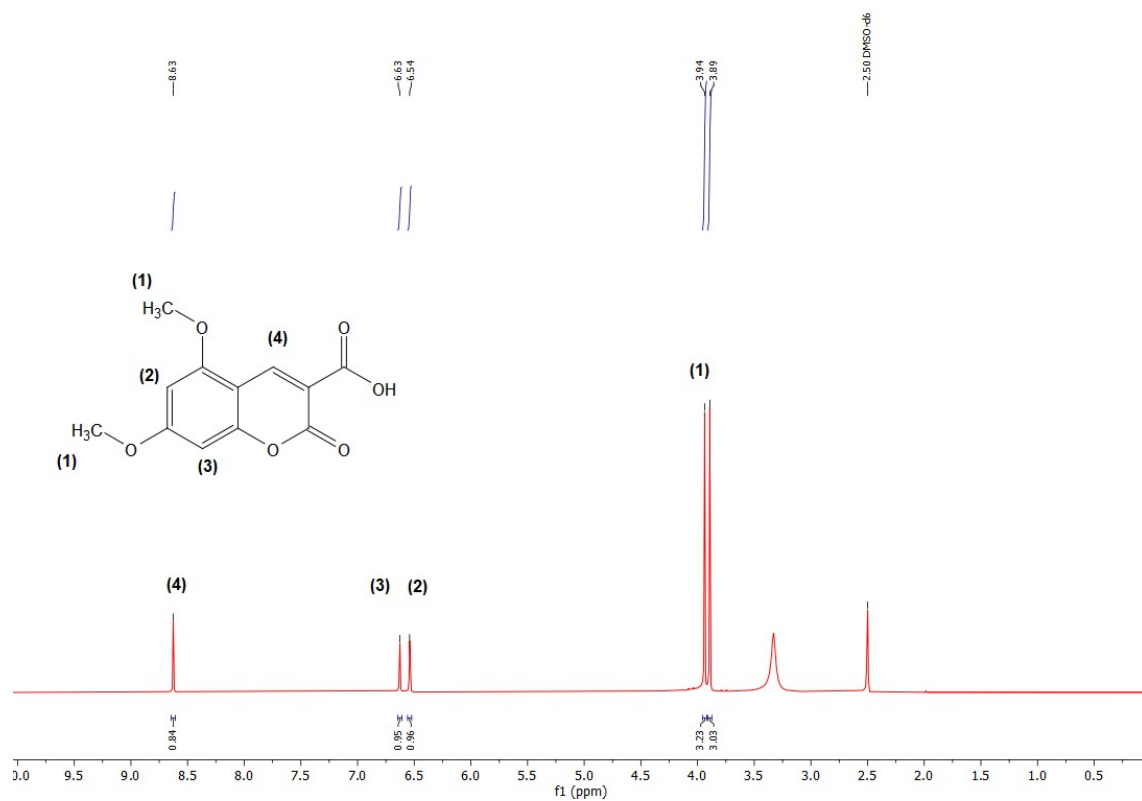

**Figure S20.** <sup>1</sup>H NMR spectrum (DMSO-*d*<sub>6</sub>, 500 MHz) of Compound (3i).

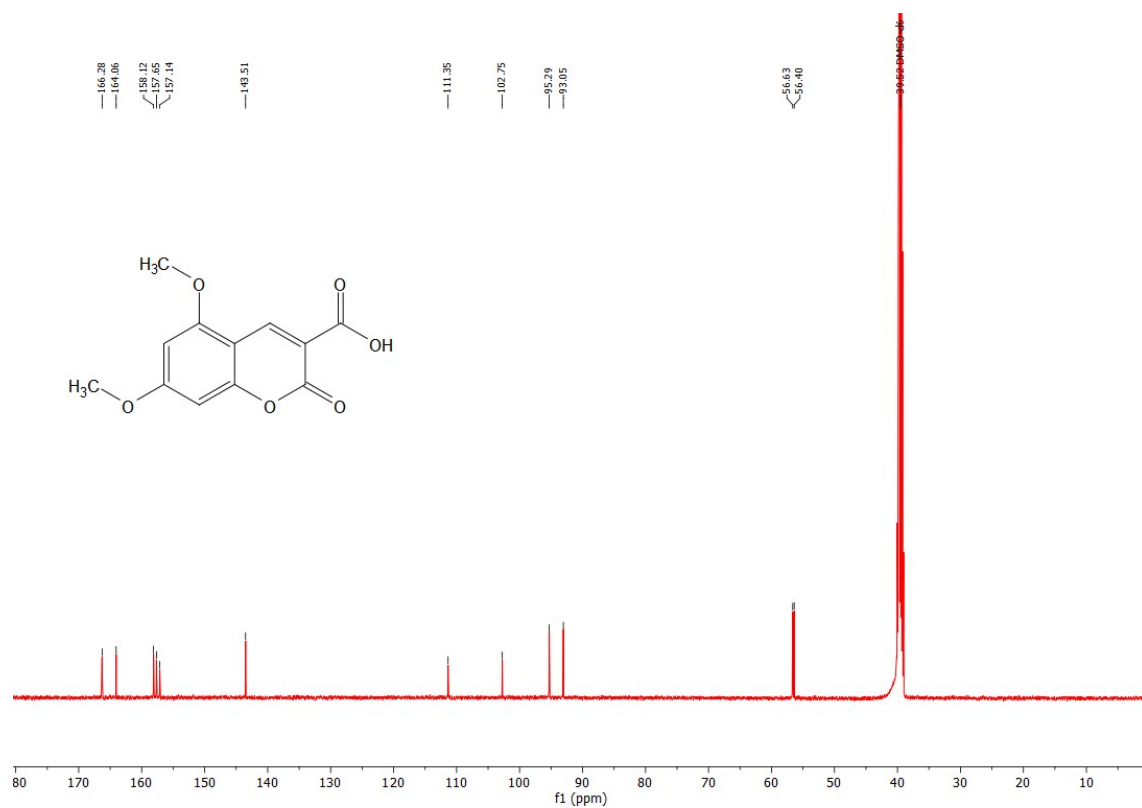

**Figure S21.** <sup>13</sup>C NMR spectrum (DMSO-*d*<sub>6</sub>, 125 MHz) of Compound (3i).
